# Supplementary material for: Linker micro-regulation of a Hofmann-based metal–organic framework for efficient propylene/propane separation
Source: Royal Society of Chemistry journal article supplement (doi:10.1039/d1qi01562a), 2022-01-01
Supplement: d1qi01562a1.pdf [file d1qi01562a1.pdf]

*Supporting Information*

**Linker micro-regulation of a Hofmann-based metal–organic  
framework for efficient propylene/propane separation**

Puxu Liu,<sup>a</sup> Kaiming Chen,<sup>a</sup> Yang Chen,<sup>a</sup> Xiaoqing Wang,<sup>a</sup> Jiangfeng Yang,<sup>a</sup> Libo

Li,<sup>a,b,\*</sup> and Jinping Li,<sup>a,b</sup>

<sup>a</sup> *College of Chemistry and Chemical Engineering, Shanxi Key Laboratory of Gas Energy*

*Efficient and Clean Utilization, Taiyuan University of Technology, Taiyuan, 030024, Shanxi, P. R.*

*China.*

<sup>b</sup> *Key Laboratory of Coal Science and Technology, Ministry of Education and Shanxi Province,*

*Taiyuan University of Technology, Taiyuan 030024, Shanxi, P. R. China*

*\*Corresponding authors E-mail: [lilibo908@hotmail.com](mailto:lilibo908@hotmail.com)*

**To *Inorganic Chemistry Frontiers***

## Table of contents

|                                                                                                                                |    |
|--------------------------------------------------------------------------------------------------------------------------------|----|
| 1. The structure of CoNi-piz along different directions.....                                                                   | 3  |
| 2. Characterization .....                                                                                                      | 4  |
| 2.1. Powder X-ray diffraction (PXRD).....                                                                                      | 4  |
| 2.2. N <sub>2</sub> sorption isotherm at 77 K .....                                                                            | 5  |
| 2.3. Scanning Electron Microscopy (SEM) .....                                                                                  | 6  |
| 2.4. EDS mapping of the synthesized CoNi-pyz .....                                                                             | 7  |
| 2.5. EDS mapping of the synthesized CoNi-piz .....                                                                             | 8  |
| 3. Adsorption isotherms for C <sub>3</sub> H <sub>8</sub> and C <sub>3</sub> H <sub>6</sub> of CoNi-pyz and CoNi-piz .....     | 9  |
| 4. Fitting curves for C <sub>3</sub> H <sub>6</sub> and C <sub>3</sub> H <sub>8</sub> adsorption isotherms .....               | 10 |
| 4.1. Fitting curves for CoNi-pyz based on different model .....                                                                | 10 |
| 4.2. Fitting curves for CoNi-piz based on different model .....                                                                | 11 |
| 5. IAST selectivity .....                                                                                                      | 12 |
| 6. Isotheric heat of adsorption .....                                                                                          | 13 |
| 6.1. Virial fitting curves and the calculated adsorption heat for CoNi-pyz .....                                               | 13 |
| 6.2. Virial fitting curves and the calculated adsorption heat for CoNi-piz.....                                                | 14 |
| 7. Dynamic breakthrough experiment.....                                                                                        | 15 |
| 8. Dynamic adsorption and desorption for C <sub>3</sub> H <sub>6</sub> and C <sub>3</sub> H <sub>8</sub> .....                 | 16 |
| 9. Dynamic breakthrough experiment under water vapor. ....                                                                     | 17 |
| 10. Supplementary tables .....                                                                                                 | 18 |
| 10.1. Dynamic capture capacity for C <sub>3</sub> H <sub>6</sub> and C <sub>3</sub> H <sub>8</sub> at mixed gas condition..... | 19 |

## 1. The structure of CoNi-piz along different directions

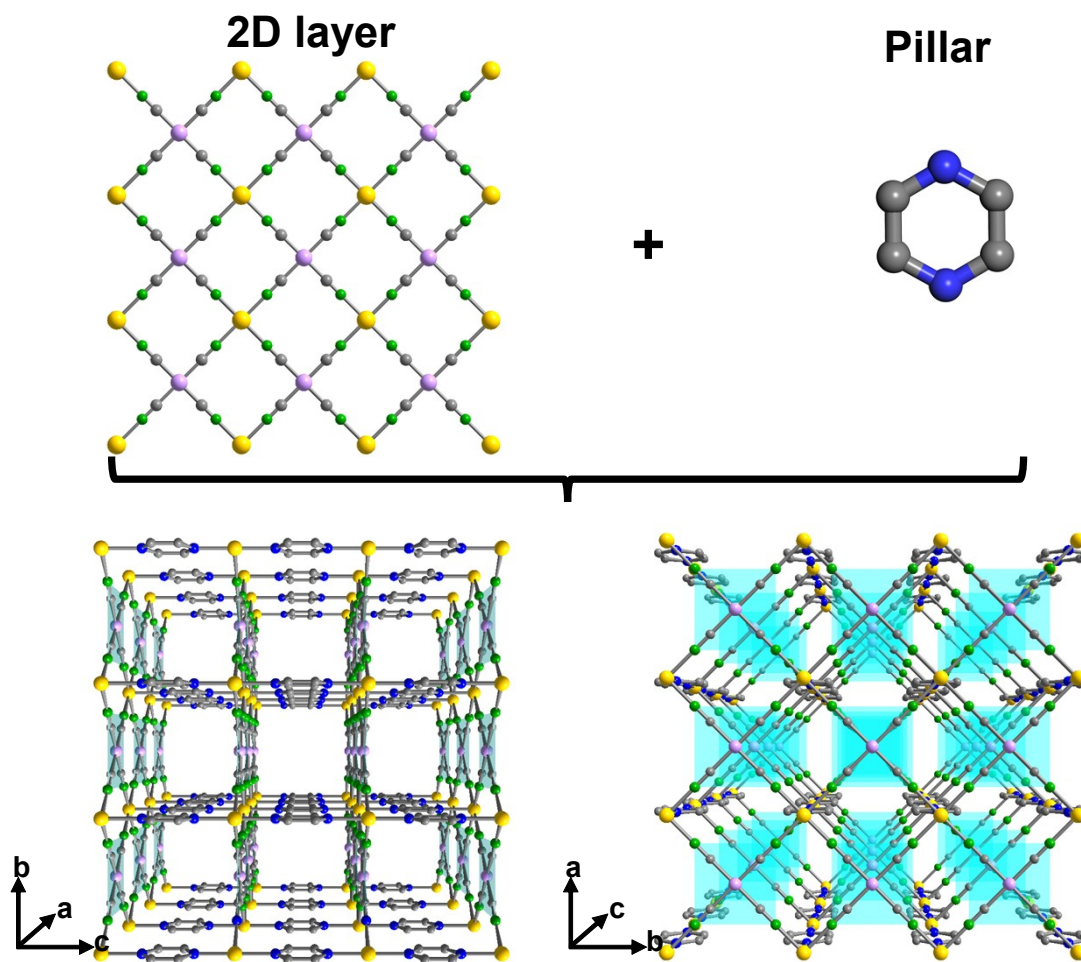

**Figure S1.** The illustration of assemble process for CoNi-piz, and the structure of resulted scaffold along different directions. (Ni, purple; Co, yellow; N, green and blue; C, gray)

## 2. Characterization

### 2.1. Powder X-ray diffraction (PXRD)

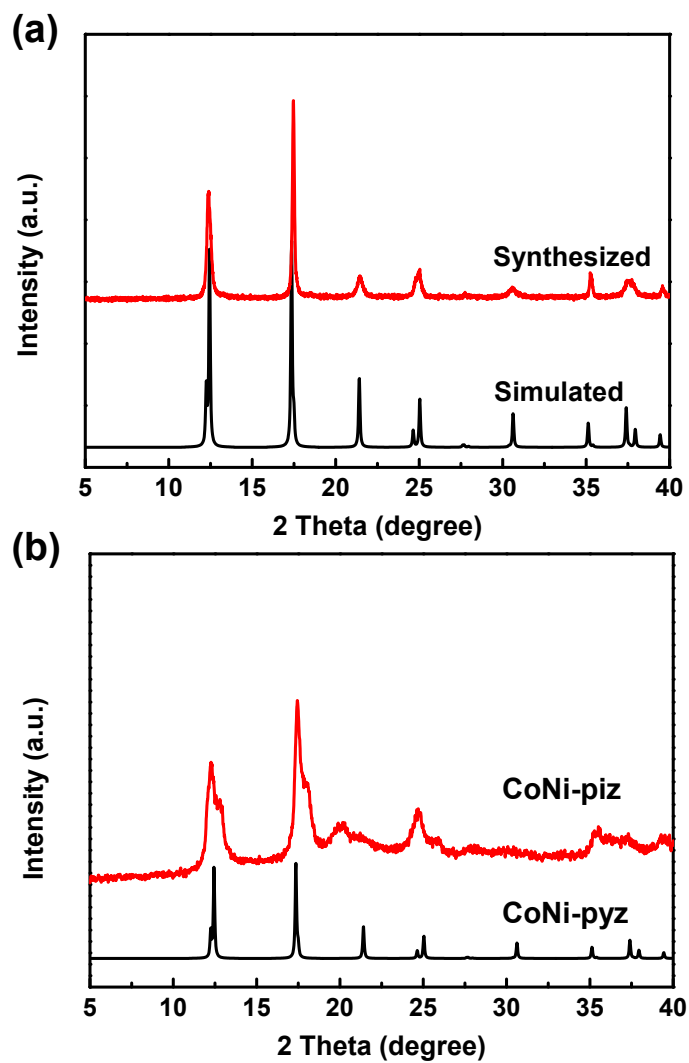

**Figure S2.** Powder X-ray diffraction (PXRD) patterns of the synthesized CoNi-pyz (a) and CoNi-piz (b).

## 2.2. N<sub>2</sub> sorption isotherm at 77 K

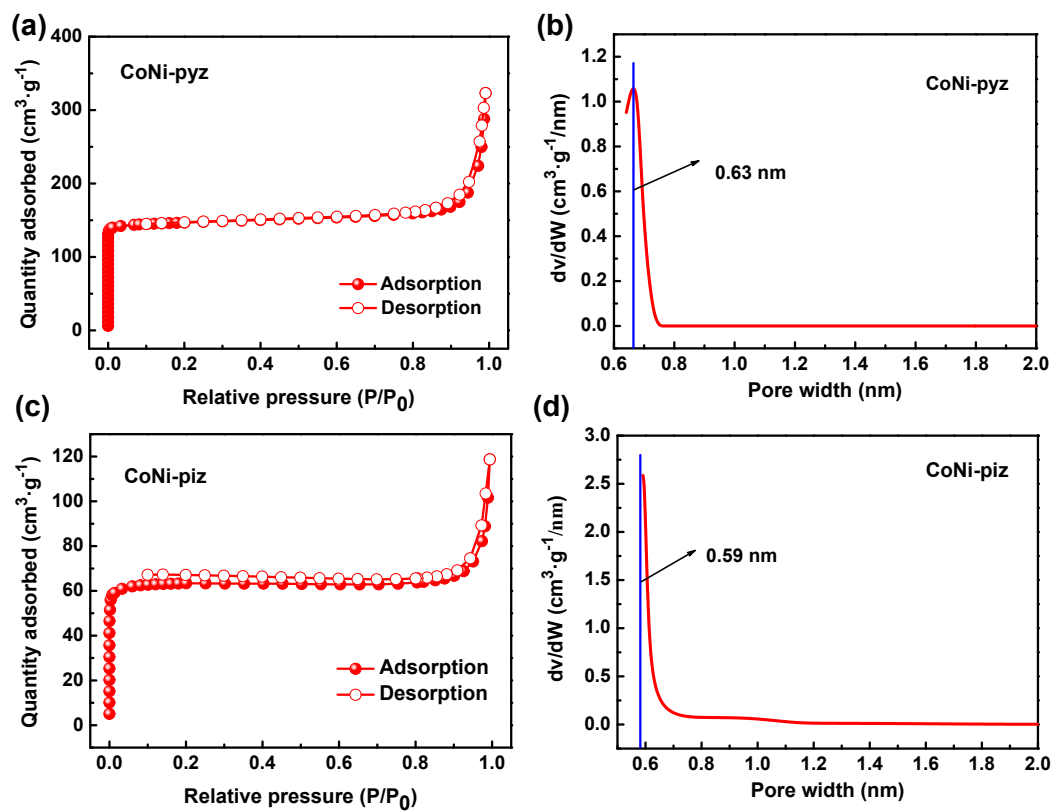

**Figure S3.** N<sub>2</sub> sorption isotherms and corresponding pore size distribution for the synthesized CoNi-pyz (a-b) and CoNi-piz (c-d).

### 2.3. Scanning Electron Microscopy (SEM)

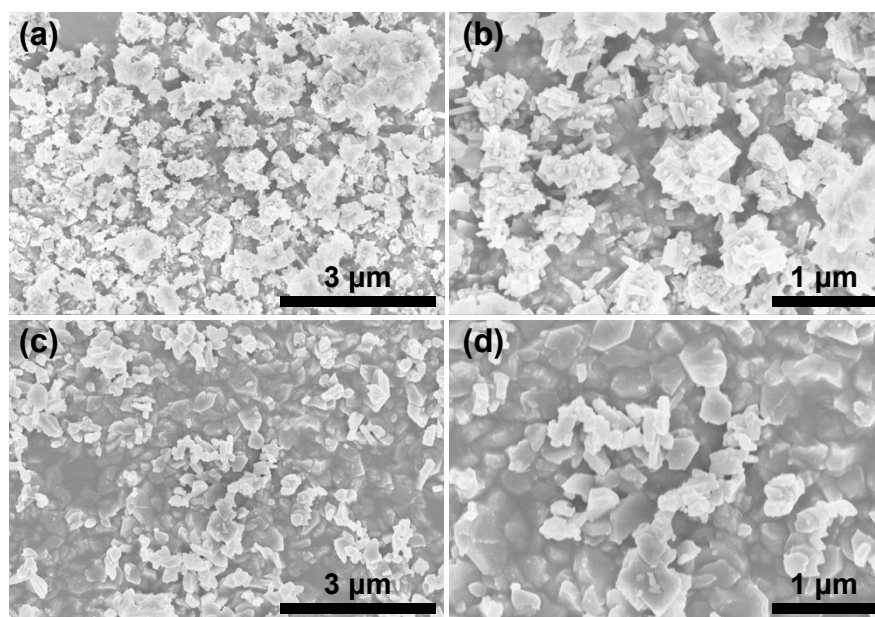

**Figure S4.** SEM images of the synthesized CoNi-pyz (a-b) and CoNi-piz (c-d) with different magnification.

## 2.4. EDS mapping of the synthesized CoNi-pyz

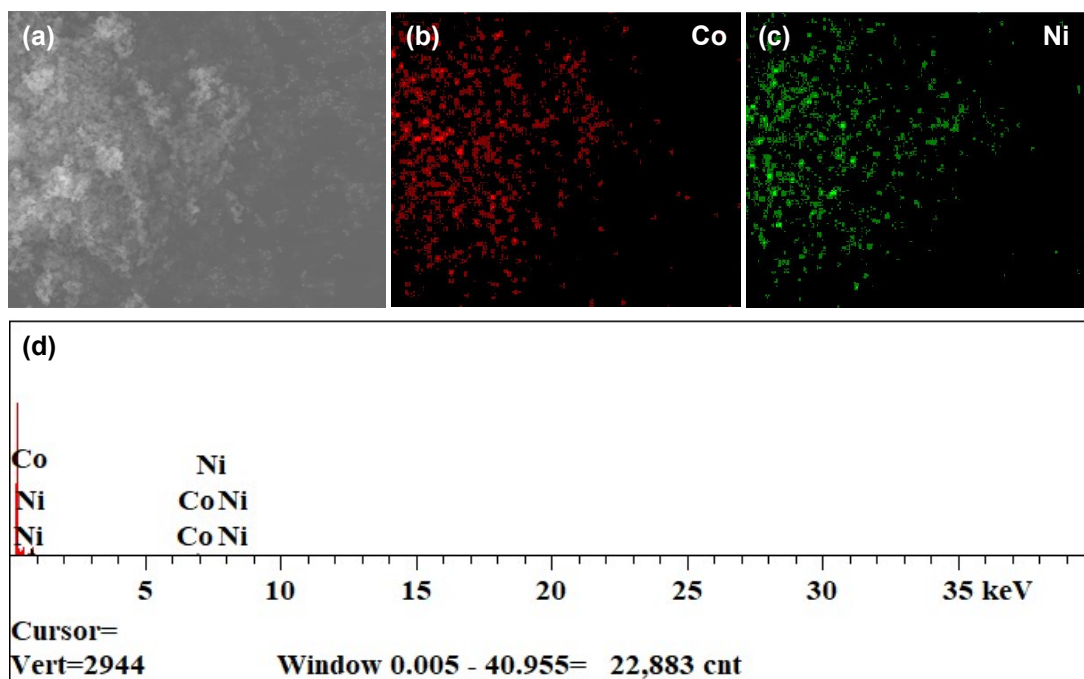

| Elt. | Line | Intensity (c/s) | Conc.   | Units |              |
|------|------|-----------------|---------|-------|--------------|
| Co   | Ka   | 13.58           | 48.303  | wt. % |              |
| Ni   | Ka   | 11.59           | 51.697  | wt. % |              |
|      |      |                 | 100.000 | Wt. % |              |
|      |      |                 |         |       | <b>Total</b> |

**Figure S5.** The EDS mapping of the synthesized CoNi-pyz, which showing the almost same content of Cobalt and Nickel of the structure.

## 2.5. EDS mapping of the synthesized CoNi-piz

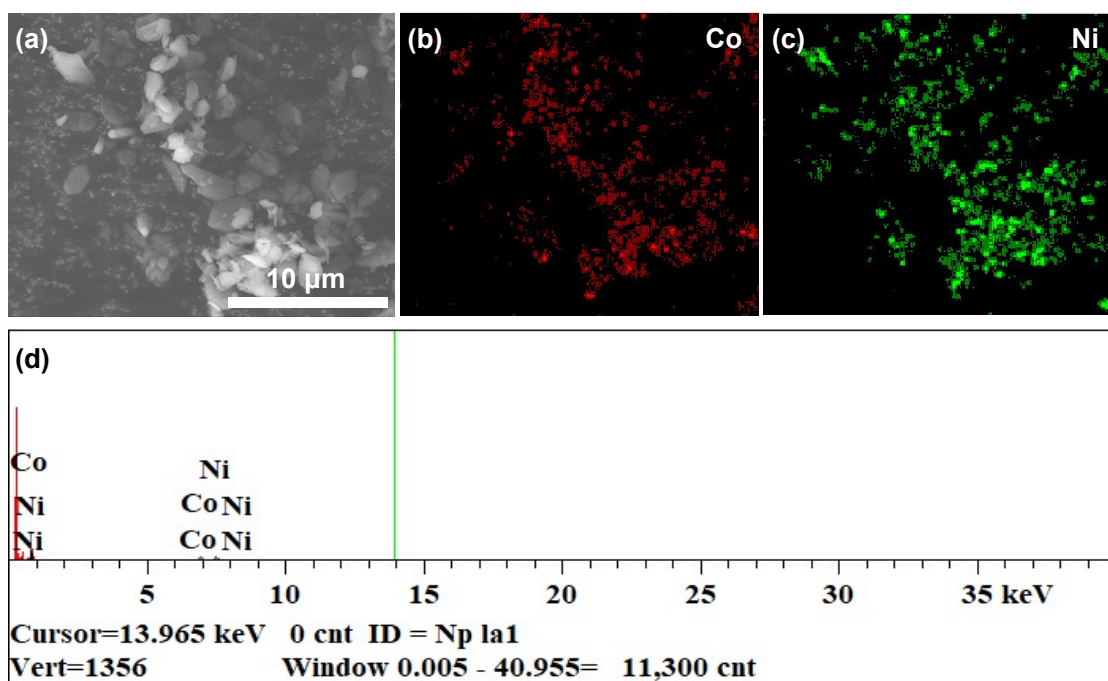

**Figure S6.** The EDS mapping of the synthesized CoNi-piz, which showing the almost same content of Cobalt and Nickel of the structure.



### 3. Adsorption isotherms for $C_3H_8$ and $C_3H_6$ of CoNi-pyz and CoNi-piz

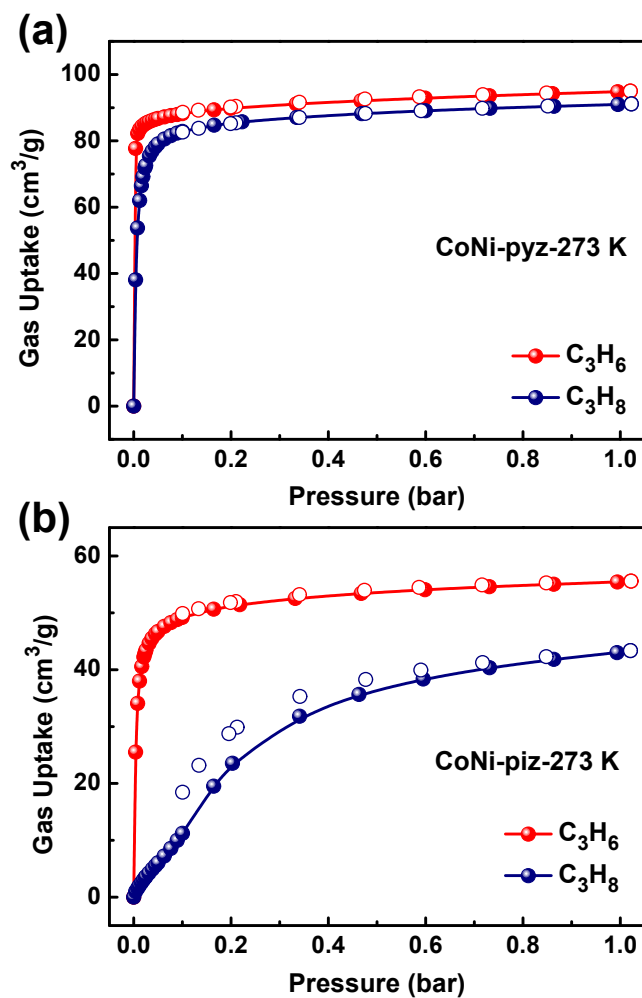

**Figure S7.** Adsorption (solid) and desorption (open) isotherms for  $C_3H_8$  (blue) and  $C_3H_6$  (red) of CoNi-pyz (a) and CoNi-piz (b) at 273 K up to 1 bar.

## 4. Fitting curves for $C_3H_6$ and $C_3H_8$ adsorption isotherms

### 4.1. Fitting curves for CoNi-pyz based on different model

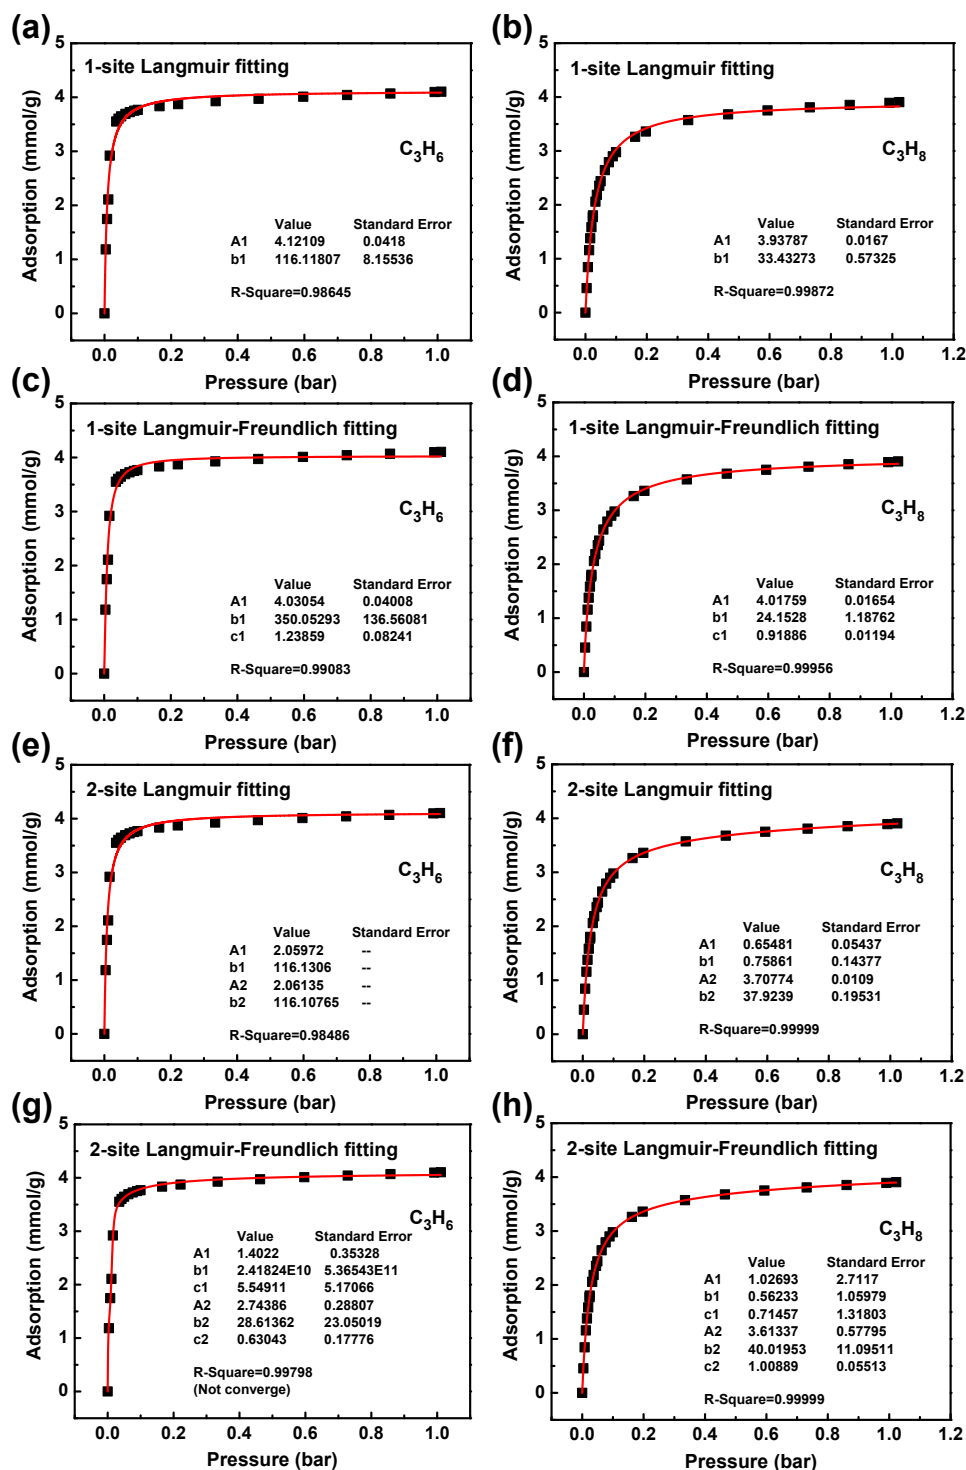

**Figure S8.** Fitting curves for  $C_3H_6$  and  $C_3H_8$  adsorption isotherms at 298 K and 1 bar based on different adsorption model, and fitting parameters of 1-site Langmuir-Freundlich model were used to calculate IAST selectivity for CoNi-pyz.

## 4.2. Fitting curves for CoNi-piz based on different model

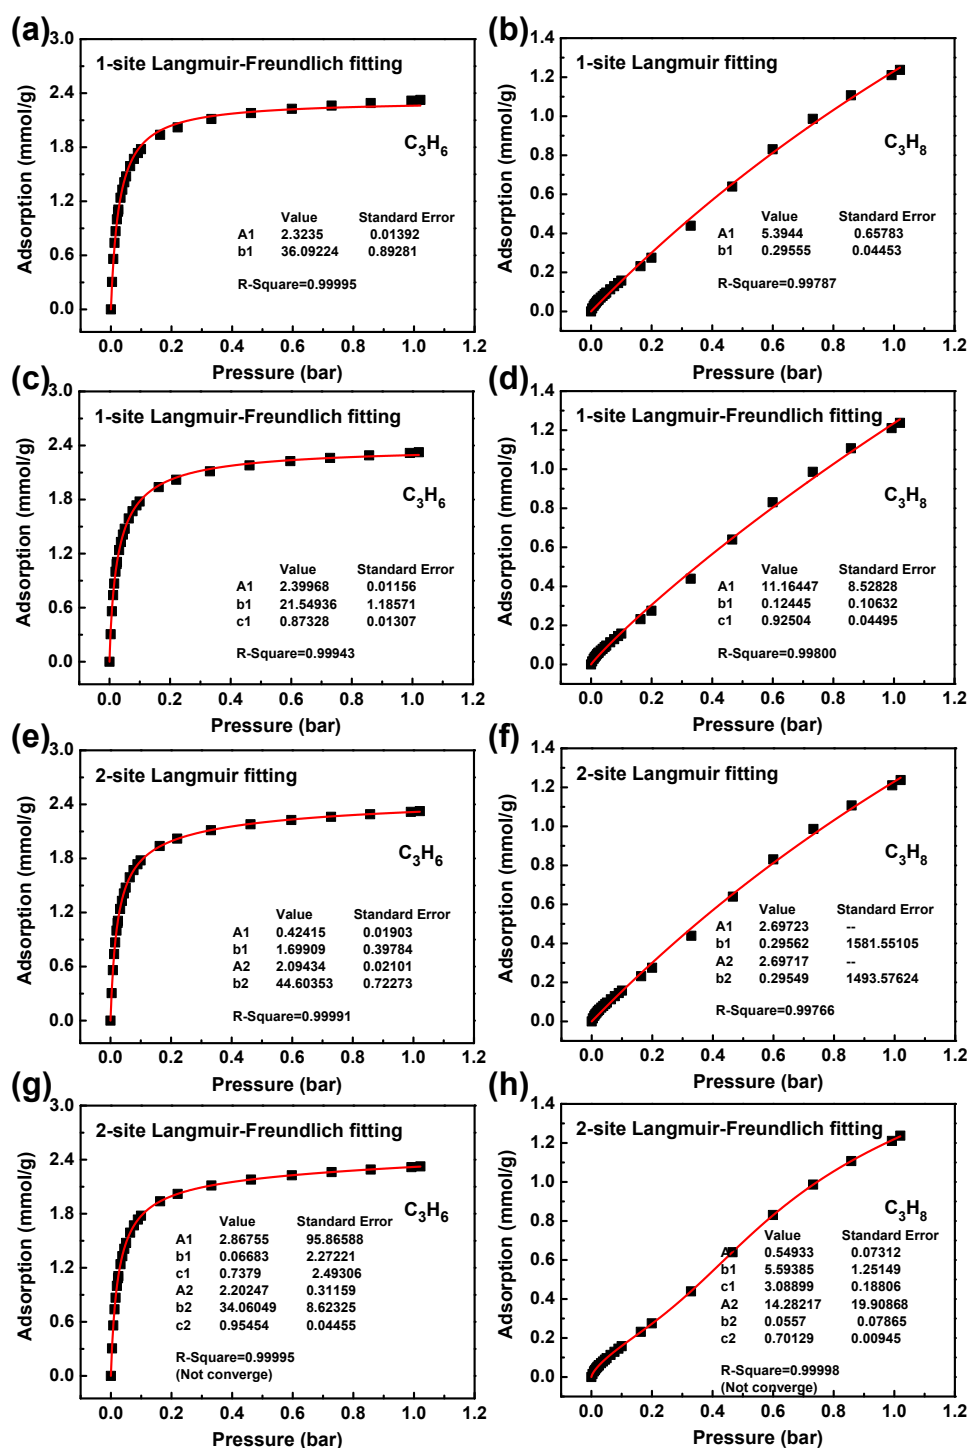

**Figure S9.** Fitting curves for  $C_3H_6$  and  $C_3H_8$  adsorption isotherms at 298 K and 1 bar based on different adsorption model, and fitting parameters of 1-site Langmuir-Freundlich model were used to calculate IAST selectivity for CoNi-piz.

## 5. IAST selectivity

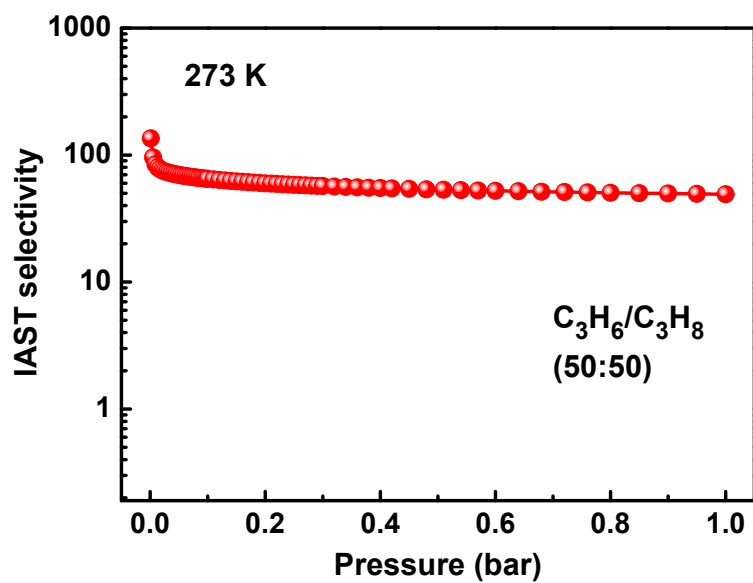

**Figure S10.** The calculated IAST selectivity for equimolar  $C_3H_6/C_3H_8$  mixture at 273 K up to 1 bar.

## 6. Isostatic heat of adsorption

### 6.1. Virial fitting curves and the calculated adsorption heat for CoNi-pyz

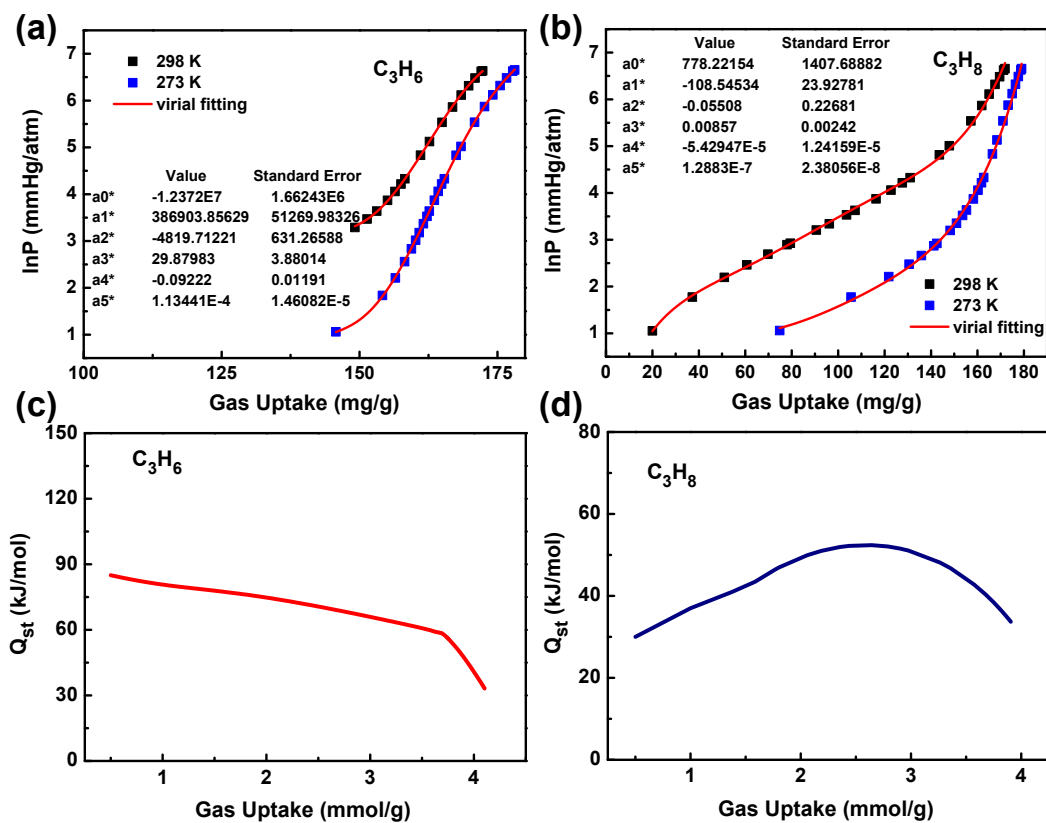

**Figure S11.** Virial fitting curves for adsorption isotherms of  $C_3H_6$  (a) and  $C_3H_8$  (b) at 298 K and 273 K up to 1 bar, and the adsorption heat for  $C_3H_6$  (c) on CoNi-pyz is much higher than that of  $C_3H_8$  (d) at zero coverage region.

## 6.2. Virial fitting curves and the calculated adsorption heat for CoNi-piz

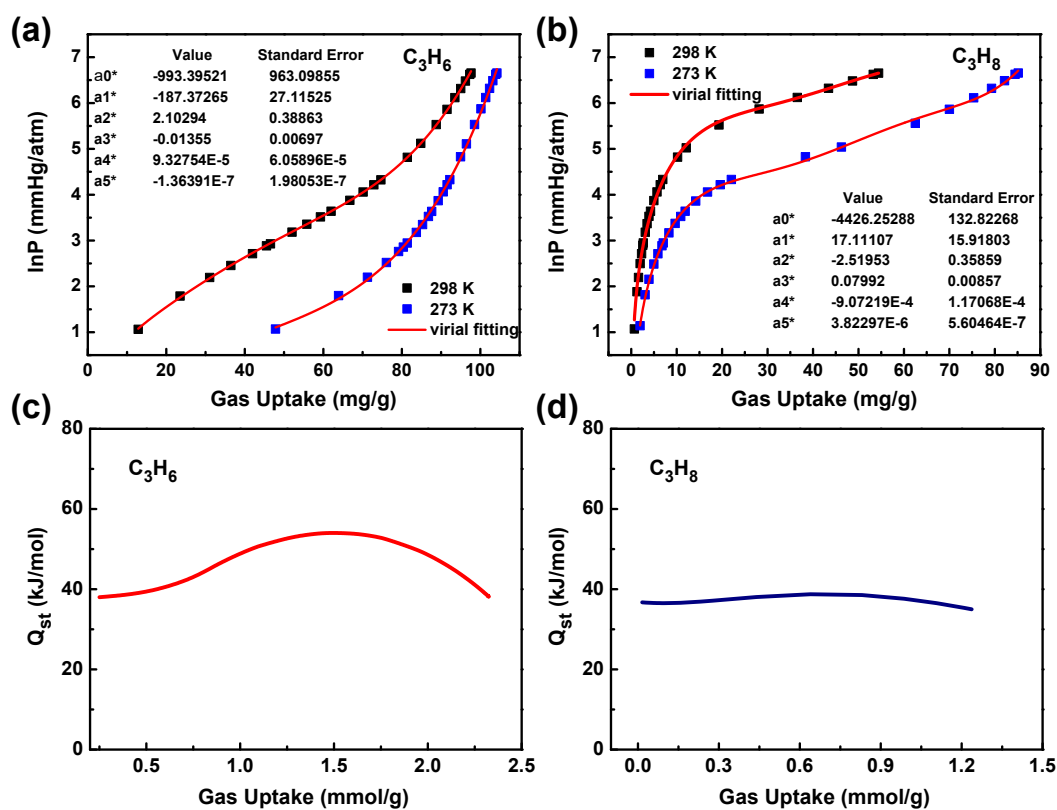

**Figure S12.** Virial fitting curves for adsorption isotherms of C<sub>3</sub>H<sub>6</sub> (a) and C<sub>3</sub>H<sub>8</sub> (b) at 298 K and 273 K up to 100 kPa, and the adsorption heat for C<sub>3</sub>H<sub>6</sub> (c) on CoNi-piz is much lowered compared with that of CoNi-pyz.

## 7. Dynamic breakthrough experiment

Dynamic breakthrough experiments were carried out on a homemade instrument, as illustrated in Figure S13. The activated shaped MOF (40-60 mesh) particle was loaded into the adsorption column, which was maintained at 298 K by a thermostat. Then the Helium was used to pump out other gas inside to purify the adsorbents. After leak detection, the mixed gas of equimolar  $C_3H_6$  and  $C_3H_8$  (50/50, v/v) flowed over the adsorption column at a rate of 2 mL/min and the effluent gas stream from the outlet was monitored by gas chromatography (GC-2014C) constantly with a thermal conductivity detector (TCD). For the cycling breakthrough experiment, the adsorption column was regenerated by purging in situ with Helium at a flow rate of 30 mL/min for 2 h at 298 K, then the breakthrough experiment was conducted. (adsorbent mass: 0.6637 g and 0.4571 g for CoNi-piz and CoNi-pyz; and the corresponding adsorption column specifications are  $\phi 4 \times 70$  mm and  $\phi 4 \times 59$  mm respectively).

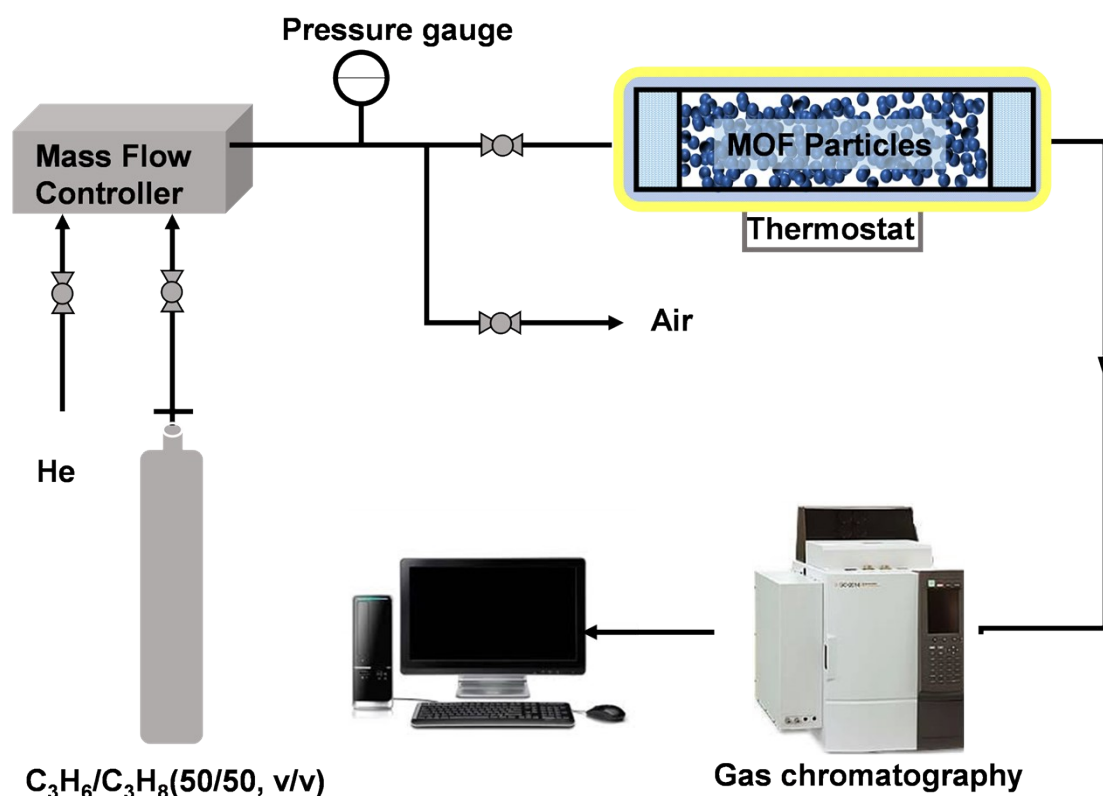

**Figure S13.** The breakthrough experimental apparatus.

## 8. Dynamic adsorption and desorption for $C_3H_6$ and $C_3H_8$

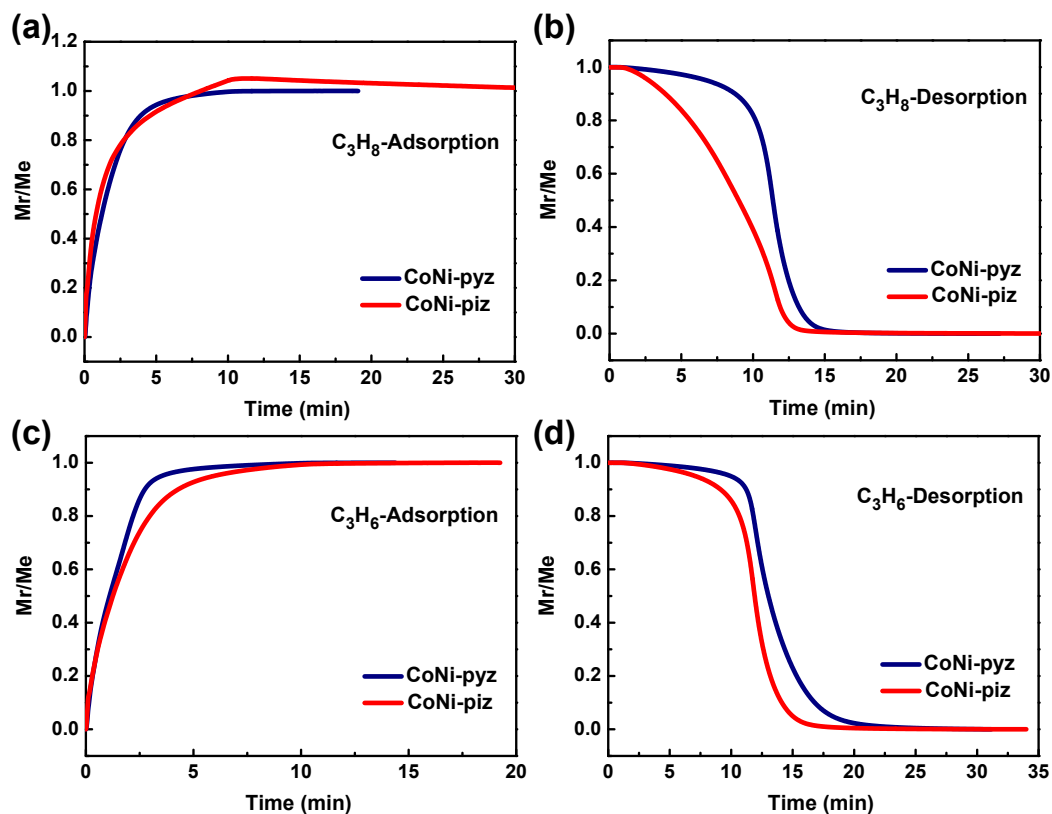

**Figure S14.** Dynamic adsorption for  $C_3H_6$  and  $C_3H_8$  at 298 K and 100 kPa on CoNi-pyz and CoNi-piz respectively. The slope of the isotherm indicates the adsorption rate for two components, which demonstrates the faster adsorption rate of  $C_3H_6$  compared to  $C_3H_8$ .



## 9. Dynamic breakthrough experiment under water vapor.

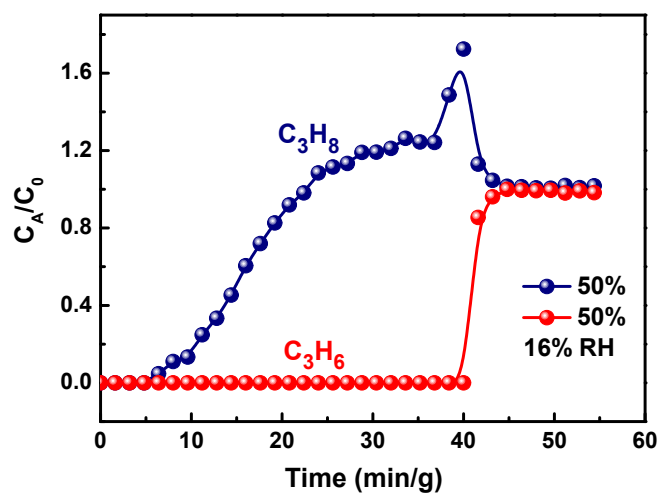

**Figure S15.** Dynamic breakthrough experiment for equimolar  $C_3H_6/C_3H_8$  mixture under 16% relative humidity with a gas flow rate of 2 mL/min.

## 10. Supplementary tables

**Table S1.** Comparison for molecular sizes and physical properties of C<sub>3</sub>H<sub>6</sub> and C<sub>3</sub>H<sub>8</sub>

| Compounds                     | Ball and Stick model                                                              | Dimensions (Å <sup>3</sup> ) | Kinetic Diameter (Å) | Boiling point (K) |
|-------------------------------|-----------------------------------------------------------------------------------|------------------------------|----------------------|-------------------|
| C <sub>3</sub> H <sub>8</sub> | 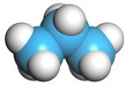 | 6.80×4.20×4.60               | 5.1                  | 231.1             |
| C <sub>3</sub> H <sub>6</sub> |  | 6.44×4.65×4.16               | 4.7                  | 225.5             |

**Table S2.** Fitting parameters of single-site Langmuir-Freundlich isotherm model for C<sub>3</sub>H<sub>6</sub> and C<sub>3</sub>H<sub>8</sub> adsorption on CoNi-pyz at 298 K and 100 kPa.

|                               | $q_{sat, A}$<br>mmol·g <sup>-1</sup> | $b_A$<br>bar <sup>-1</sup> | $v_A$<br>dimensionless | R-Square |
|-------------------------------|--------------------------------------|----------------------------|------------------------|----------|
| C <sub>3</sub> H <sub>6</sub> | 4.03054                              | 350.0529                   | 1.23859                | 0.99083  |
| C <sub>3</sub> H <sub>8</sub> | 4.01759                              | 24.1528                    | 0.91886                | 0.99956  |

**Table S3.** Fitting parameters of single-site Langmuir-Freundlich isotherm model for C<sub>3</sub>H<sub>6</sub> and C<sub>3</sub>H<sub>8</sub> adsorption on CoNi-piz at 298 K and 100 kPa.

|                               | $q_{sat, A}$<br>mmol·g <sup>-1</sup> | $b_A$<br>bar <sup>-1</sup> | $v_A$<br>dimensionless | R-Square |
|-------------------------------|--------------------------------------|----------------------------|------------------------|----------|
| C <sub>3</sub> H <sub>6</sub> | 2.39968                              | 21.54936                   | 0.87328                | 0.99943  |
| C <sub>3</sub> H <sub>8</sub> | 11.16447                             | 0.12445                    | 0.92504                | 0.99800  |

**Table S4.** Fitting parameters of single-site Langmuir-Freundlich isotherm model for C<sub>3</sub>H<sub>6</sub> and C<sub>3</sub>H<sub>8</sub> adsorption on CoNi-pyz at 273 K and 100 kPa.

|                               | $q_{sat, A}$<br>mmol·g <sup>-1</sup> | $b_A$<br>bar <sup>-1</sup> | $v_A$<br>dimensionless | R-Square |
|-------------------------------|--------------------------------------|----------------------------|------------------------|----------|
| C <sub>3</sub> H <sub>6</sub> | 5.33157                              | 3.74983                    | 0.11534                | 0.99907  |
| C <sub>3</sub> H <sub>8</sub> | 4.03597                              | 93.81032                   | 0.85816                | 0.99771  |

**Table S5.** Fitting parameters of single-site Langmuir-Freundlich isotherm model for C<sub>3</sub>H<sub>6</sub> and C<sub>3</sub>H<sub>8</sub> adsorption on CoNi-piz at 273 K and 100 kPa.

|                               | $q_{sat, A}$<br>mmol·g <sup>-1</sup> | $b_A$<br>bar <sup>-1</sup> | $v_A$<br>dimensionless | R-Square |
|-------------------------------|--------------------------------------|----------------------------|------------------------|----------|
| C <sub>3</sub> H <sub>6</sub> | 2.49974                              | 38.57111                   | 0.66881                | 0.99665  |
| C <sub>3</sub> H <sub>8</sub> | 2.23093                              | 6.44072                    | 1.28231                | 0.99764  |

### 10.1. Dynamic capture capacity for C<sub>3</sub>H<sub>6</sub> and C<sub>3</sub>H<sub>8</sub> at mixed gas condition.

To determine the adsorption amount at the mixed gas condition, the dynamic

saturated adsorption capacity of each component ( $q_{i,m}$ ) is calculated based on the breakthrough curves by the equation described as follows:

$$q_{i,m} = \frac{\int_0^{t_0} (F_i - F_e) \Delta t - V_{dead}}{m} \quad (1)$$

Where the  $F_i$  is the flow rate of specific gas at the inlet of the adsorption column with the unit of mL/min, while the  $F_e$  represent the effluent flow rate of the corresponding gas species;  $V_{dead}$  is the dead volume of the system ( $\text{cm}^3$ ); And  $m$  represents the mass of the adsorbent loaded into the adsorption column (g);  $t_0$  is the retention time interval for the gas mixture.

**Table S6.** Dynamic adsorption amount for  $\text{C}_3\text{H}_6$  and  $\text{C}_3\text{H}_8$  on CoNi-pyz and CoNi-piz respectively based on the breakthrough experiment for equimolar  $\text{C}_3\text{H}_6/\text{C}_3\text{H}_8$  mixture.

|                                                   | $\text{C}_3\text{H}_6/\text{C}_3\text{H}_8$ mixture |          |
|---------------------------------------------------|-----------------------------------------------------|----------|
|                                                   | CoNi-pyz                                            | CoNi-piz |
| $\text{C}_3\text{H}_6$ ( $\text{cm}^3/\text{g}$ ) | 77.7                                                | 35.6     |
| $\text{C}_3\text{H}_8$ ( $\text{cm}^3/\text{g}$ ) | 58.0                                                | 19.0     |

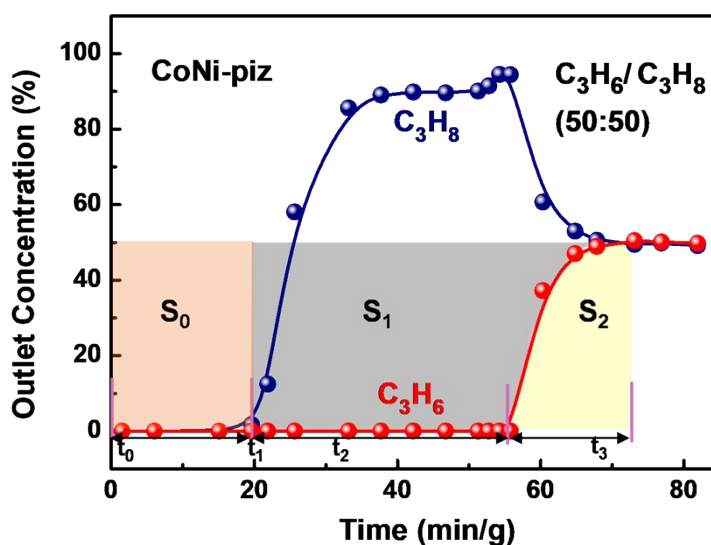

**Figure S16.** Dynamic adsorption calculation for  $\text{C}_3\text{H}_6$  and  $\text{C}_3\text{H}_8$  at 298 K and 100 kPa

based on the breakthrough experiment for CoNi-piz.

According to the equation above, here we take the C<sub>3</sub>H<sub>6</sub>/C<sub>3</sub>H<sub>8</sub> (50/50, v/v) mixture as an example to show the calculation detail. The C<sub>3</sub>H<sub>8</sub> adsorption amount was demonstrated as the orange area (S<sub>0</sub>), thus  $q_{C_3H_8} = F_e (t_1 - t_0) \times 0.5 = 19 \text{ cm}^3/\text{g}$ ; While for C<sub>3</sub>H<sub>6</sub> adsorption, we integrated the area of (S<sub>0</sub>+S<sub>1</sub>), and its capture amount was 35.6 cm<sup>3</sup>/g.

**Table S7.** Comparison among adsorbents for C<sub>3</sub>H<sub>6</sub>/C<sub>3</sub>H<sub>8</sub> separation at 298 K and 100 kPa.

| Adsorbents                                   | C <sub>3</sub> H <sub>6</sub> adsorption | C <sub>3</sub> H <sub>8</sub> adsorption | Q <sub>st,C3H6</sub> | Q <sub>st,C3H8</sub> | Selectivity               | Ref. |
|----------------------------------------------|------------------------------------------|------------------------------------------|----------------------|----------------------|---------------------------|------|
|                                              | mmol·g <sup>-1</sup>                     | mmol·g <sup>-1</sup>                     | kJ·mol <sup>-1</sup> | kJ·mol <sup>-1</sup> | (50/50)                   |      |
| Cu <sub>3</sub> (BTC) <sub>2</sub>           | 7.7 (323 K)                              | 6.6 (323 K)                              | 42                   | 28                   | 23.1 <sup>b</sup> (323 K) | S1   |
| MIL-100(Fe)                                  | 1.4 (303 K)                              | 0.6 (303 K)                              | 70 <sup>c</sup>      | 30 <sup>c</sup>      | 28.9 (313 K)              | S2   |
| MIL-101(Cr)                                  | 3.94 (313 K)                             | 2.2 (313 K)                              | \                    | \                    | 6.0 (313 K)               | S3   |
| Mg-MOF-74                                    | 8.2                                      | 7.1                                      | 60.5                 | 33.9                 | 18.7 <sup>b</sup>         | S4   |
| Co-MOF-74                                    | 5.9 (296 K)                              | 5.2 (296 K)                              | 53.0                 | 47.0                 | 8.6 (296 K)               | S5   |
| Mn-MOF-74                                    | 6.0                                      | 4.5                                      | 48.0                 | 34.0                 | 24                        | S6   |
| Fe-MOF-74                                    | 6.8 (318 K)                              | 6.0 (318 K)                              | 44.0                 | 33.0                 | 13 (318 K)                | S7   |
| Ni-MOF-74                                    | 7.0 (318 K)                              | 5.7 (318 K)                              | 46                   | 34                   | 11.0 (318 K)              | S8   |
| Mn <sub>2</sub> (m-dobdc)                    | 7.1                                      | 5.8                                      | 67                   | 38.0                 | 39                        |      |
| Fe <sub>2</sub> (m-dobdc)                    | 7.2                                      | 5.8                                      | 73                   | 46                   | 56                        | S9   |
| Co <sub>2</sub> (m-dobdc)                    | 7.5                                      | 5.9                                      | 52                   | 52                   | 39                        |      |
| Ni <sub>2</sub> (m-dobdc)                    | 7.2                                      | 6.0                                      | 54                   | 45                   | 35                        |      |
| [Zn <sub>2</sub> (5-aip) <sub>2</sub> (bpy)] | 1.9                                      | 0.75                                     | 46.2                 | 25.5                 | 19.8                      | S10  |
| ZIF-7                                        | 2.0                                      | 1.5                                      | \                    | \                    | \                         | S11  |
| ZIF-8                                        | 3.2 (0.5 bar, 303 K)                     | 3.3 (0.5 bar, 303 K)                     | 30                   | 34                   | 125 <sup>a</sup>          | S12  |
| ZIF-67                                       | 4.6 (308 K)                              | 4.8 (308 K)                              | 25                   | 26.4                 | 200 <sup>a</sup>          | S13  |
| NJU-Bai8                                     | 2.8                                      | 2.8                                      | \                    | \                    | 4                         | S14  |

|                              |             |      |                   |                   |                          |                  |
|------------------------------|-------------|------|-------------------|-------------------|--------------------------|------------------|
| ELM-12                       | 1.47        | 1.36 | 30                | 28                | 204 <sup>a</sup>         | S15              |
| DBTO                         | 1.5         | 1.1  | \                 | \                 | 11 <sup>a</sup>          | S16              |
| BTO                          | 0.75        | 0.6  | \                 | \                 | 12 <sup>a</sup>          |                  |
| Zn(ox) <sub>0.5</sub> (trz)  | 2.3 (303 K) | \    | 43                | \                 | 860 (303 K) <sup>a</sup> | S17              |
| Zn(ox) <sub>0.5</sub> (atrz) | 1.7 (303 K) | \    | \                 | \                 | 175 (303 K) <sup>a</sup> |                  |
| Co(IPA)(BPY) <sub>0.5</sub>  | 1.99        | 0.49 | 41.8              | \                 | 21                       | S18              |
| Y-abtc                       | 2.0         | \    | 50                | \                 | \                        | S19              |
| HAIM-301                     | 3.16        | \    | 40                | \                 | \                        | S20              |
| KAUST-7                      | 1.4         | \    | 57.4              | \                 | \                        | S21              |
| JNU-3a                       | 2.6         | 2.1  | 29.3 <sup>c</sup> | 16.1 <sup>c</sup> | 513                      | S22              |
| Co-gallate                   | 1.78        | \    | 41                | \                 | \                        | S23              |
| CoNi-pyz                     | 4.10        | 3.90 | 83                | 30                | 3                        | <b>This work</b> |
| CoNi-piz                     | 2.32        | 1.23 | 38                | 36                | 15                       |                  |

<sup>a</sup> Kinetic selectivity; <sup>b</sup> Calculated by the Herry constants for C<sub>3</sub>H<sub>6</sub> and C<sub>3</sub>H<sub>8</sub>; <sup>c</sup> Measured by calorimetry

## References

1. N. Lamia, M. Jorge, M. A. Granato, F. A. Almeida Paz, H. Chevreau and A. E. Rodrigues, Adsorption of propane, propylene and isobutane on a metal–organic framework: Molecular simulation and experiment, *Chem. Eng. Sci.*, 2009, **64**, 3246-3259.
2. J. W. Yoon, Y.-K. Seo, Y. K. Hwang, J.-S. Chang, H. Leclerc, S. Wuttke, P. Bazin, A. Vimont, M. Daturi, E. Bloch, P. L. Llewellyn, C. Serre, P. Horcajada, J.-M. Grenèche, A. E. Rodrigues and G. Férey, Controlled Reducibility of a Metal–Organic Framework with Coordinatively Unsaturated Sites for Preferential Gas Sorption, *Angew. Chem. Int. Ed.*, 2010, **49**, 5949-5952.
3. S.-J. Lee, J. W. Yoon, Y.-K. Seo, M.-B. Kim, S.-K. Lee, U. H. Lee, Y. K. Hwang, Y.-S. Bae and J.-S. Chang, Effect of purification conditions on gas storage and separations in a chromium-based metal–organic framework MIL-101, *Microporous Mesoporous Mater.*, 2014, **193**, 160-165.
4. Z. Bao, S. Alnemrat, L. Yu, I. Vasiliev, Q. Ren, X. Lu and S. Deng, Adsorption of Ethane, Ethylene, Propane, and Propylene on a Magnesium-Based Metal–Organic Framework, *Langmuir*, 2011, **27**, 13554-13562.
5. Y. He, R. Krishna and B. Chen, Metal–organic frameworks with potential for energy-efficient adsorptive separation of light hydrocarbons, *Energy Environ. Sci.*, 2012, **5**, 9107-9120.
6. Y.-S. Bae, C. Y. Lee, K. C. Kim, O. K. Farha, P. Nickias, J. T. Hupp, S. T. Nguyen and R. Q. Snurr, High Propene/Propane Selectivity in Isostructural Metal–Organic Frameworks with High Densities of Open Metal Sites, *Angew. Chem. Int. Ed.*, 2012, **51**, 1857-1860.
7. D. Bloch Eric, L. Queen Wendy, R. Krishna, M. Zdrozny Joseph, M. Brown Craig and R. Long Jeffrey, Hydrocarbon Separations in a Metal–Organic Framework with Open Iron(II) Coordination Sites, *Science*, 2012, **335**, 1606-1610.
8. S. J. Geier, J. A. Mason, E. D. Bloch, W. L. Queen, M. R. Hudson, C. M. Brown and J. R. Long, Selective adsorption of ethylene over ethane and propylene over propane in the metal–organic frameworks M2(dobdc) (M = Mg, Mn, Fe, Co, Ni, Zn), *Chem. Sci.*, 2013, **4**, 2054-2061.
9. J. E. Bachman, M. T. Kapelewski, D. A. Reed, M. I. Gonzalez and J. R. Long, M2(m-dobdc) (M = Mn, Fe, Co, Ni) Metal–Organic Frameworks as Highly Selective, High-Capacity Adsorbents for Olefin/Paraffin Separations, *J. Am. Chem. Soc.*, 2017, **139**, 15363-15370.
10. Y. Chen, H. Wu, D. Lv, N. Yuan, Q. Xia and Z. Li, A pillar-layer metal-organic framework for efficient adsorption separation of propylene over propane, *Sep. Purif. Technol.*, 2018, **204**, 75-80.
11. C. Gücüyener, J. van den Bergh, J. Gascon and F. Kapteijn, Ethane/Ethene Separation Turned on Its Head: Selective Ethane Adsorption on the Metal–Organic Framework ZIF-7 through a Gate-Opening Mechanism, *J. Am. Chem. Soc.*, 2010, **132**, 17704-17706.
12. K. Li, D. H. Olson, J. Seidel, T. J. Emge, H. Gong, H. Zeng and J. Li, Zeolitic Imidazolate Frameworks for Kinetic Separation of Propane and Propene, *J. Am. Chem. Soc.*, 2009, **131**, 10368-10369.
13. P. Krokidas, M. Castier, S. Moncho, D. N. Sredojevic, E. N. Brothers, H. T. Kwon, H.-K. Jeong, J. S. Lee and I. G. Economou, ZIF-67 Framework: A Promising New Candidate for Propylene/Propane Separation. Experimental Data and Molecular Simulations, *J. Phys. Chem. C*, 2016, **120**, 8116-8124.
14. X. Wang, R. Krishna, L. Li, B. Wang, T. He, Y.-Z. Zhang, J.-R. Li and J. Li, Guest-dependent pressure induced gate-opening effect enables effective separation of propene and propane in a flexible MOF, *Chem. Eng. J.*, 2018, **346**, 489-496.



15. L. Li, R.-B. Lin, X. Wang, W. Zhou, L. Jia, J. Li and B. Chen, Kinetic separation of propylene over propane in a microporous metal-organic framework, *Chem. Eng. J.*, 2018, **354**, 977-982.
16. C. Y. Lee, Y.-S. Bae, N. C. Jeong, O. K. Farha, A. A. Sarjeant, C. L. Stern, P. Nickias, R. Q. Snurr, J. T. Hupp and S. T. Nguyen, Kinetic Separation of Propene and Propane in Metal–Organic Frameworks: Controlling Diffusion Rates in Plate-Shaped Crystals via Tuning of Pore Apertures and Crystallite Aspect Ratios, *J. Am. Chem. Soc.*, 2011, **133**, 5228-5231.
17. J. Peng, H. Wang, D. H. Olson, Z. Li and J. Li, Efficient kinetic separation of propene and propane using two microporous metal organic frameworks, *Chem. Commun.*, 2017, **53**, 9332-9335.
18. Y. Chen, H. Wu, L. Yu, S. Tu, Y. Wu, Z. Li and Q. Xia, Separation of propylene and propane with pillar-layer metal–organic frameworks by exploiting thermodynamic-kinetic synergetic effect, *Chem. Eng. J.*, 2021, DOI: <https://doi.org/10.1016/j.cej.2021.133284>, 133284.
19. H. Wang, X. Dong, V. Colombo, Q. Wang, Y. Liu, W. Liu, X.-L. Wang, X.-Y. Huang, D. M. Proserpio, A. Sironi, Y. Han and J. Li, Tailor-Made Microporous Metal–Organic Frameworks for the Full Separation of Propane from Propylene Through Selective Size Exclusion, *Adv. Mater.*, 2018, **30**, 1805088.
20. L. Yu, X. Han, H. Wang, S. Ullah, Q. Xia, W. Li, J. Li, I. da Silva, P. Manuel, S. Rudić, Y. Cheng, S. Yang, T. Thonhauser and J. Li, Pore Distortion in a Metal–Organic Framework for Regulated Separation of Propane and Propylene, *J. Am. Chem. Soc.*, 2021, **143**, 19300-19305.
21. A. Cadiau, K. Adil, P. M. Bhatt, Y. Belmabkhout and M. Eddaoudi, A metal-organic framework–based splitter for separating propylene from propane, *Science*, 2016, **353**, 137-140.
22. H. Zeng, M. Xie, T. Wang, R.-J. Wei, X.-J. Xie, Y. Zhao, W. Lu and D. Li, Orthogonal-array dynamic molecular sieving of propylene/propane mixtures, *Nature.*, 2021, **595**, 542-548.
23. B. Liang, X. Zhang, Y. Xie, R.-B. Lin, R. Krishna, H. Cui, Z. Li, Y. Shi, H. Wu, W. Zhou and B. Chen, An Ultramicroporous Metal–Organic Framework for High Sieving Separation of Propylene from Propane, *J. Am. Chem. Soc.*, 2020, **142**, 17795-17801.
